# Supplementary material
Source: Research Square preprint supplement (doi:10.21203/rs.3.rs-9488803/v1)
Supplement: Supplementary file 1 [file 2b7074af6a4b77b1008decab.pdf]

**Functional Assessment of Chronic Illness Therapy-Tuberculosis (FACIT-TB) FACIT-TB Scale**

| Items                                                                              | Yes                      | No                       |
|------------------------------------------------------------------------------------|--------------------------|--------------------------|
| Domain: Physical Well-being                                                        |                          |                          |
| 1. I feel ill                                                                      | <input type="checkbox"/> | <input type="checkbox"/> |
| 2. I get tired easily                                                              | <input type="checkbox"/> | <input type="checkbox"/> |
| 3. I have a lack of energy                                                         | <input type="checkbox"/> | <input type="checkbox"/> |
| 4. I have pain                                                                     | <input type="checkbox"/> | <input type="checkbox"/> |
| 5. I feel weak all over                                                            | <input type="checkbox"/> | <input type="checkbox"/> |
| 6. I feel fatigued                                                                 | <input type="checkbox"/> | <input type="checkbox"/> |
| 7. I have been short of breath                                                     | <input type="checkbox"/> | <input type="checkbox"/> |
| 8. I have nausea "a sense of vomiting outbreak"                                    | <input type="checkbox"/> | <input type="checkbox"/> |
| 9. Because of my physical condition, I have trouble meeting the needs of my family | <input type="checkbox"/> | <input type="checkbox"/> |
| 10. I am bothered by fever (episode of high body temperature)                      | <input type="checkbox"/> | <input type="checkbox"/> |
| 11. I am forced to spend time in bed                                               | <input type="checkbox"/> | <input type="checkbox"/> |
| 12. I have discomfort or pain in my stomach area                                   | <input type="checkbox"/> | <input type="checkbox"/> |
| 13. I have had itching                                                             | <input type="checkbox"/> | <input type="checkbox"/> |
| 14. I have a loss of appetite                                                      | <input type="checkbox"/> | <input type="checkbox"/> |
| 15. I have been coughing                                                           | <input type="checkbox"/> | <input type="checkbox"/> |
| 16. I am bothered by side effects of treatment                                     | <input type="checkbox"/> | <input type="checkbox"/> |
| 17. Dust worsens my symptoms                                                       | <input type="checkbox"/> | <input type="checkbox"/> |
| Domain: Social and economic well-being                                             |                          |                          |
| 18. I feel close to my friends                                                     | <input type="checkbox"/> | <input type="checkbox"/> |
| 19. I get emotional support from my family                                         | <input type="checkbox"/> | <input type="checkbox"/> |
| 20. I am satisfied with family communication about my illness                      | <input type="checkbox"/> | <input type="checkbox"/> |
| 21. My family has accepted my illness                                              | <input type="checkbox"/> | <input type="checkbox"/> |
| 22. I feel close to my partner (or the person who is my main support)              | <input type="checkbox"/> | <input type="checkbox"/> |
| 23. I get support from my friends                                                  | <input type="checkbox"/> | <input type="checkbox"/> |
| 24. My physical condition and/or medical treatment cause me financial difficulties | <input type="checkbox"/> | <input type="checkbox"/> |
| Domain: Emotional well-being/Stigma of having TB                                   |                          |                          |
| 25. I worry that my condition will get worse                                       | <input type="checkbox"/> | <input type="checkbox"/> |
| 26. I worry about dying                                                            | <input type="checkbox"/> | <input type="checkbox"/> |
| 27. I am concerned about what the future holds for me                              | <input type="checkbox"/> | <input type="checkbox"/> |
| 28. I am embarrassed by my illness                                                 | <input type="checkbox"/> | <input type="checkbox"/> |
| 29. It is hard to tell other people about my disease                               | <input type="checkbox"/> | <input type="checkbox"/> |
| 30. I am losing hope in the fight against my illness                               | <input type="checkbox"/> | <input type="checkbox"/> |
| 31. I am bothered by change in weight                                              | <input type="checkbox"/> | <input type="checkbox"/> |
| 32. I worry about spreading my infection                                           | <input type="checkbox"/> | <input type="checkbox"/> |
| 33. I feel nervous                                                                 | <input type="checkbox"/> | <input type="checkbox"/> |
| 34. I feel sad                                                                     | <input type="checkbox"/> | <input type="checkbox"/> |
| 35. I am satisfied with how I am coping with my illness                            | <input type="checkbox"/> | <input type="checkbox"/> |

|                                                              |                          |                          |
|--------------------------------------------------------------|--------------------------|--------------------------|
| Domain: Functional well-being                                |                          |                          |
| 36. I am content with the quality of my life right now       | <input type="checkbox"/> | <input type="checkbox"/> |
| 37. My work (include work at home) is fulfilling             | <input type="checkbox"/> | <input type="checkbox"/> |
| 38. I am able to work (include work at home)                 | <input type="checkbox"/> | <input type="checkbox"/> |
| 39. I am able to enjoy life                                  | <input type="checkbox"/> | <input type="checkbox"/> |
| 40. I am enjoying the things I usually do for fun            | <input type="checkbox"/> | <input type="checkbox"/> |
| 41. I have accepted my illness                               | <input type="checkbox"/> | <input type="checkbox"/> |
| 42. I am sleeping well                                       | <input type="checkbox"/> | <input type="checkbox"/> |
| Domain: Spiritual well-being                                 |                          |                          |
| 43. I find strength in my faith or spiritual belief          | <input type="checkbox"/> | <input type="checkbox"/> |
| 44. My illness has strengthened my faith or spiritual belief | <input type="checkbox"/> | <input type="checkbox"/> |
| 45. My life is still productive                              | <input type="checkbox"/> | <input type="checkbox"/> |
