# Supplementary material
Source: Research Square preprint supplement (doi:10.21203/rs.3.rs-9488803/v1)
Supplement: Supplementary file 2 [file 302b6d1fc6c37268cb82bd4f.pdf]

**Morisky 8-item Medication adherence scale**

| Items                                                                                                                                      | Yes                      | No                       |
|--------------------------------------------------------------------------------------------------------------------------------------------|--------------------------|--------------------------|
| 1. Do you sometimes forget to take your TB pills?                                                                                          | <input type="checkbox"/> | <input type="checkbox"/> |
| 2. Over the past two weeks, were there any days when you did not take your TB medicine?                                                    | <input type="checkbox"/> | <input type="checkbox"/> |
| 3. Have you ever cut back or stopped taking your medication without telling your doctor because you felt worse when you took it?           | <input type="checkbox"/> | <input type="checkbox"/> |
| 4. When you travel or leave home, do you sometimes forget to bring along your medications?                                                 | <input type="checkbox"/> | <input type="checkbox"/> |
| 5. Did you take your TB medicine yesterday?                                                                                                | <input type="checkbox"/> | <input type="checkbox"/> |
| 6. When you feel like your TB symptoms are under control, do you sometimes stop taking your medicine?                                      | <input type="checkbox"/> | <input type="checkbox"/> |
| 7. Taking medication every day is a real inconvenience for some people. Do you ever feel hassled about sticking to your TB treatment plan? | <input type="checkbox"/> | <input type="checkbox"/> |
| 8. Are there any additional challenges that you face in trying to complete your TB treatment?                                              | <input type="checkbox"/> | <input type="checkbox"/> |

The MMAS-8 Scale, content, name, and trademarks are protected by US copyright and trademark laws. Permission for use of the scale and its coding is required. A license agreement is available from MMAR, LLC., [www.moriskyscale.com](http://www.moriskyscale.com).

The MORISKY SCALE (© 2007 Donald E. Morisky)
