# Supplementary material
Source: Research Square preprint supplement (doi:10.21203/rs.3.rs-9488803/v1)
Supplement: Supplementary file 3 [file 698be739c2033f3ecd831d7a.docx]

**Table 1: Factors associated with total HRQoL**

**Variables n (%) Median (IQR) HRQoL p**

**Age group**

30 54 (26.6) 42.8 (34.2, 58.5) 0.015

30 – 59 128 (63.1) 39.7 (32.2, 45.6)

>= 60 21 910.3) 37.2 (30.6, 41.7)

Median (IQR) 37 (28,47)

Range 18 - 80

**Gender**

Male 128 (63.1) 41.7 (33.9, 46.7) 0.025

Female 75 (36.9) 37.8 (30.6, 44.4)

**Marital status**

Single 74 (36.5) 41.7 (33.8, 56.0) <0.001

Married 111 (54.7) 40.6 (33.3, 44.4)

Widowed/separated 18 (8.9) 30.6 (26.4, 38.5)

**Educational status**

No education/ Primary 43 (21.2) 38.3 (25.5, 43.3) 0.003

Secondary 101 (49.8) 40.0 (33.1, 43.9)

Tertiary 59 (29.1) 43.9 (33.9, 60.6)

**HIV status**

Positive 35 (17.2) 36.7 (26.7, 41.7) 0.007

Negative 160 (78.8) 41.1 (33.3, 46.7)

Not known 8 (3.9) 36.4 (29.9, 46.4)

**Treatment helpful**

Yes 178 (87.7) 40.0 (32.8, 46.1) 0.843

Not sure 25 (12.3) 41.1 (29.7, 49.2)

**Employment status**

Employed 104 (51.2) 40.6 (34.4, 50.0) 0.065

Unemployed 99 (48.8) 39.2 (31.7, 44.4)

**Treatment facility**

Secondary 151 (74.4) 40.6 (32.8, 46.7) 0.461

Primary 52 (25.6) 38.3 (32.4, 44.4)

**Perception of disease severity**

Mild/Moderate 125 (61.6) 40.6 (33.9, 46.7) 0.358

Severe 78 (38.4) 39.7 (31.7, 45.7)

**Knowledge of TB**

Poor 22 (10.8) 37.5 (30.1, 41.9) 0.189

Good 181 (89.2) 40.6 (32.8, 46.4)

**Alcohol intake**

Yes 85 (41.9) 41.7 (33.6, 46.4) 0.269

No 118 (58.1) 38.4 (32.1, 45.7)

**Cigarette smoking**

Yes 50 (24.6) 41.1 (33.2, 46.1) 0.614

No 153 (75.4) 39.4 (32.2, 46.7)

**Length of treatment(months)**

≤ 3 months 94 (46.3) 40.3 (33.2, 46.1) 0.835

>3 months 109 (53.7) 39.4 (32.2, 46.4)

**Barrier to TB treatment**

Yes 36 (17.7) 38.6 (31.3, 43.1) 0.114

No 167 (82.3) 40.6 (32.8, 46.7)

NB: HRQoL = Health-related quality of life, IQR = Interquatile range, TB = tuberculosis

**Table 2: Partial correlation between adherence and the domains of HRQoL before and after controlling for future orientation**

**Correlation before controlling for future orientation**

**Variables Adherence Physical Social Emotional Functional Spiritual FO**

**r,p r,p r,p r,p r,p r,p r,p**

Adherence 1

Physical HRQL 0.373, <0.001 1

Social HRQoL 0.535, <0.001 0.491, <0.001 1

Emotional HRQoL 0.377, <0.001 0.485, <0.001 0.459, <0.001 1

Functional HRQoL 0.410, <0.001 0.440, <0.001 0.507, <0.001 0.220, 0.002 1

Spiritual HRQoL 0.476, <0.001 0.287, <0.001 0.477, <0.001 0.278, <0.001 0.403, <0.001 1

Future orientation 0.647, <0.001 0.381, <0.0**01 0.442, <0.001 0.487, <0.001 0.340, <0.001 0.434, <0.001 1**

**Correlation after controlling for future orientation**

**Variables Adherence Physical Social Emotional Functional Spiritual**

**r,p r,p r,p r,p r,p r,p**

Adherence 1

Physical HRQoL 0.180, 0.010 1

Social HRQoL 0.365, <0.001 0.389, <0.001 1

Emotional HRQoL 0.093, 0.188 0.370, <0.001 0.311, <0.001 1

Functional HRQoL 0.265, <0.001 0.357, <0.001 0.423, <0.001 0.067, 0.345 1

Spiritual HRQoL 0.284, <0.001 0.146, 0.039 0.353, <0.001 0.084, 0.236 0.301, <0.001 1

NB: FO = Future orientation, HRQoL = Health related quality of life, r = correlation coefficient.

**Table 3: Association between adherence and health-related quality of life**

**Variable Adherence Non-adherence p**

**n = 161 n = 42**

Domains (median, IQR)

Physical 27.9 (20.6,34.6) 11.8 (8.4, 14.7) <0.001

Social 67.9 (53.6, 78.6) 35.7 (27.7, 42.9) <0.001

Emotional 38.6 (29.6, 48.9) 18.2 (13.6, 25.6) <0.001

Functional 50.0 (39.3, 71.4) 30.4 (20.5, 42.9) <0.001

Spiritual 83.3 (70.8, 91.7) 50.0 (33.3, 66.7) <0.001

Total 42.2 (36.9, 48.1) 25.6 (23.3, 29.4) <0.001

NB: IQR = Interquatile range. Medication adherence was reported by 161 (79.3%).

MMAS® 2006 used with permission [www.moriskyscale.com.](http://www.moriskyscale.com.)

**Table 4: Hierarchical multiple regression analysis on HRQoL**

**Variable Step 1 Step 2 Step 3**

**B, p-value B, p-value B, p-value**

Age -0.186 0.014 -0.159 0.011 -0.146 0.019

Gender -0.158 0.017 -0.125 0.023 -0.102 0.064

Marital status -0.122 0.106 -0.055 0.380 -0.052 0.403

Educational status 0.299 <0.001 0.172 0.002 0.183 0.001

HIV status 0.125 0.059 0.091 0.099 0.084 0.123

Adherence 0.316 <0.001 0.450 <0.001

Future orientation 0.262 <0.001 0.293 <0.001

Adherence x future orientation 0.201 0.018

F 10.677 <0.001 23.607 <0.001 21.877 0.001

R2 0.220 0.469 0.485

Adjusted R2 0.200 0.449 0.463

ΔR² 0.220 0.249 0.016

**Table 5: Slope analysis showing the impact of adherence on HRQoL at low and high future orientation**

Adherence β t p

Low future orientation 0.390 5.371 <0.001

High future orientation 0.664 5.297 <0.001
