# Supplementary material
Source: Research Square preprint supplement (doi:10.21203/rs.3.rs-9488803/v1)
Supplement: Supplementary file 4 [file ada5a7ef2467004d3ad6e145.pdf]

## **Deferment of Gratification Scale (DGS)**

For the next set of statements, please think about whether you agree or disagree with the statement. For example, if the statement is extremely uncharacteristic of you, you may choose "Strongly Disagree." On the other hand, if the statement is extremely characteristic of you, you may choose "Strongly Agree." Use the options in the middle if you fall somewhere in between.

|        | Items                                                                                                   | <b>STRONG<br/>LY<br/>AGREE</b> | <b>AGREE</b> | <b>NOT<br/>SURE</b> | <b>DISAGRE<br/>E</b> | <b>STRONG<br/>LY<br/>DISAGRE<br/>E</b> |
|--------|---------------------------------------------------------------------------------------------------------|--------------------------------|--------------|---------------------|----------------------|----------------------------------------|
| DGS 1  | You are good in saving your money so you can buy bigger things at a later time                          |                                |              |                     |                      |                                        |
| DGS 2  | Relief from stress in the present is <u>more</u> important to you than having good health in the future |                                |              |                     |                      |                                        |
| DGS 3  | As a child I saved any pocket money that I had                                                          |                                |              |                     |                      |                                        |
| DGS 4  | When I am at the supermarket I buy more things than I planned for                                       |                                |              |                     |                      |                                        |
| DGS 5  | I am constantly without money                                                                           |                                |              |                     |                      |                                        |
| DGS 6  | I agree with the philosophy eat drink and enjoy yourself for tomorrow we may all be dead                |                                |              |                     |                      |                                        |
| DGS 7  | I describe myself as acting without thinking for my own good                                            |                                |              |                     |                      |                                        |
| DGS 8  | I often think it is important to wait and think things over before deciding                             |                                |              |                     |                      |                                        |
| DGS 9  | I like spending my money immediately I get it                                                           |                                |              |                     |                      |                                        |
| DGS 10 | It is hard for me to avoid losing my temper when someone makes me angry                                 |                                |              |                     |                      |                                        |
| DGS 11 | It is easy for me to be patient when waiting for things most times                                      |                                |              |                     |                      |                                        |
| DGS 12 | You think you are good at planning for things ahead                                                     |                                |              |                     |                      |                                        |
